1           **Cultivation and characterization of a novel clade of deep-sea Chloroflexi:**  
2           **providing a glimpse of the phylum Chloroflexi involved in sulfur cycling**

3           Rikuan Zheng<sup>1,2,3,4</sup>, Ruining Cai<sup>1,2,3,4</sup>, Rui Liu<sup>1,2,4</sup>, Yeqi Shan<sup>1,2,3,4</sup>, Ge Liu<sup>1,2,4</sup>, Chaomin Sun<sup>1,2,4\*</sup>

4           <sup>1</sup>CAS Key Laboratory of Experimental Marine Biology & Center of Deep Sea  
5           Research, Institute of Oceanology, Chinese Academy of Sciences, Qingdao, China

6           <sup>2</sup>Laboratory for Marine Biology and Biotechnology, Qingdao National Laboratory  
7           for Marine Science and Technology, Qingdao, China

8           <sup>3</sup>College of Earth Science, University of Chinese Academy of Sciences, Beijing,  
9           China

10          <sup>4</sup>Center of Ocean Mega-Science, Chinese Academy of Sciences, Qingdao, China

11

12          \* Corresponding author

13          Chaomin Sun      Tel.: +86 532 82898857; fax: +86 532 82898857.

14                            E-mail address: [sunchaomin@qdio.ac.cn](mailto:sunchaomin@qdio.ac.cn)

15

16

17          **Key words:** Chloroflexi, deep sea, cultivation, sulfur cycle, novel class

18          **Running title:** Chloroflexi bacteria contribute to sulfur cycle

19

20

21 **Abstract**

22 Chloroflexi bacteria are abundant and globally distributed in various unexplored  
23 biospheres on Earth. However, only few Chloroflexi members have been cultivated,  
24 hampering further understanding of this important group. In the current study, we  
25 firstly clarify the high abundance of the phylum Chloroflexi in deep-sea sediments via  
26 the operational taxonomic units analysis. We further successfully isolate a novel  
27 Chloroflexi strain ZRK33 from cold seep sediments by using an enrichment medium  
28 constantly supplemented with rifampicin. Phylogenetic analyses based on 16S rRNA  
29 gene, genome, RpoB and EF-tu proteins indicate that strain ZRK33 represents a novel  
30 class, and the class is designated as Sulfochloroflexia because whole set of genes  
31 encoding key enzymes responsible for assimilatory sulfate reduction are identified in  
32 the genome of strain ZRK33. Indeed, assimilation of sulfate or thiosulfate by strain  
33 ZRK33 evidently benefits its growth and morphogenesis. Proteomic results suggest  
34 that metabolization of sulfate or thiosulfate significantly promotes the transport and  
35 degradation of various macromolecules and thereby stimulating the energy production.  
36 Notably, the putative genes associated with assimilatory and dissimilatory sulfate  
37 reduction ubiquitously distribute in the metagenome-assembled genomes of 27  
38 Chloroflexi members derived from deep-sea sediments, strongly suggesting that  
39 Chloroflexi bacteria play undocumented key roles in deep-sea sulfur cycling.

40

41

## 42 **Introduction**

43 Deep marine subsurface is one of the least-understood habitats on Earth and is  
44 estimated to contain up to  $3 \times 10^{29}$  microbial cells, which is equivalent to the combined  
45 microbial biomass of the oceanic water column and terrestrial soil [1]. The  
46 prokaryotic biomass in deep marine subsurface sediments exceeds  $10^5$  microbial  
47 cells/cm<sup>3</sup> even at depths of nearly to 1,000 m below the seafloor [2,3]. These  
48 microorganisms are the primary drivers of elemental cycles within deep marine  
49 subsurface sediments and play key roles in the recycling of biogeochemical nutrients  
50 to the water column [4]. Members of the phylum Chloroflexi widely distributed in  
51 various environments with high abundance, for example, in some marine subsurface  
52 sediments the number of Chloroflexi bacteria is shown to be closely equivalent to  
53 other total bacterial counts [3,5-8], strongly suggesting that the phylum Chloroflexi is  
54 an essential group to maintain the population equilibrium of marine subsurface  
55 ecosystems [9-12].

56 The phylum Chloroflexi, formerly called the ‘green nonsulfur bacteria’, is a  
57 remarkably diverse, deeply branching lineage in the domain Bacteria [13]. Currently,  
58 the phylum Chloroflexi is divided phylogenetically into nine classes, including  
59 Chloroflexia [14], Anaerolineae [15], Caldilineae [15], Ktedonobacteria [16],  
60 Thermomicrobia [17], Dehalococcoidia [18], Tepidiformia [19], Thermoflexia [20]  
61 and Ardenticatenia [21]. Concomitant with the expansion of the phylum Chloroflexi  
62 by cultivation, studies utilizing cultivation-independent techniques have revealed a

63 remarkable diversity of as-yet uncultivated microorganisms affiliated with the phylum  
64 Chloroflexi [22], indicating immeasurable novel lineages of Chloroflexi existing in  
65 nature. Despite the Chloroflexi bacteria being among the first widespread microbial  
66 lineages discovered in deep-sea environments we still lack cultured representatives  
67 (especially those with relative fast growing rate) for this group and their detailed  
68 physiological, genetic and ecological properties are currently almost completely  
69 obscure [13,23,24]. For example, until now, only basic physiological characteristics  
70 of two cultured strains of Chloroflexi with extremely slow growth rate (doubling time  
71 from 1.5 days to 19 days) from the deep-sea sediments are available [10,23], and their  
72 central metabolisms and contributions to biogeochemical processes including sulfur  
73 cycling are largely unknown.

74       The cycling of sulfur is one of Earth's major biogeochemical processes and is  
75 closely related to the energy metabolism of microorganisms living in the cold seep  
76 and hydrothermal vents [25-27]. Importantly, the coupling of sulfate/sulfite reduction  
77 to oxidation of H<sub>2</sub>, small chain fatty acids, or other carbon compounds limits the  
78 availability of these substrates to other organisms like methanogens and alters the  
79 energetics via syntrophic interactions, and thereby impacting the methane production  
80 [25]. Given the importance of sulfur cycling in the deep biospheres, it is vital that we  
81 understand which organisms can carry out the reactions and the pathways involved  
82 [27]. Based on metagenomic sequencing results, some SAR202 members of the  
83 phylum of Chloroflexi are predicted to be sulfite-oxidizers, making them as potential

84 key players in the sulfur cycle at the deep marine environment [28]; based on  
85 single-cell genomic sequencing results, some members of Dehalococcoidia class  
86 within the phylum Chloroflexi are demonstrated to possess diverse genes encoding  
87 dissimilatory sulfite reductase [4], suggesting that Dehalococcoidia bacteria could  
88 drive sulfite reduction and respire oxidized sulfur compounds. Together, some of the  
89 members of Chloroflexi are believed to play a previously unrecognized role in sulfur  
90 cycling, which needs to be verified with cultured representatives of Chloroflexi  
91 isolated from deep-sea environments.

92 In this study, we checked the abundance of Chloroflexi existing in both deep-sea  
93 cold seep and hydrothermal vents. Using an enrichment medium continuously  
94 supplemented with rifampicin pressure, we have successfully isolated a novel member  
95 of Chloroflexi, strain ZRK33, from the deep marine subsurface sediments collected  
96 from a typical cold seep in the South China Sea (1,146 m water depth). Strain ZRK33  
97 is further to shown to be a representative of a novel class of the phylum Chloroflexi,  
98 designated as Sulfochloroflexia given that strain ZRK33 is demonstrated to assimilate  
99 sulfate and thiosulfate. Lastly, the broad distribution of diverse genes encoding key  
100 enzymes driving both sulfur assimilatory and dissimilatory reduction in the  
101 metagenome-assembled genomes from deep-sea sediments is detailed analyzed.

## 102 **Materials and methods**

### 103 **Sampling and operational taxonomic units (OTUs) analysis**

104 The deep-sea sediment samples were collected by *RV KEXUE* from a typical cold  
105 seep in the South China Sea (E 119°17'07.322", N 22°06'58.598") at a depth of  
106 approximately 1,146 m and two hydrothermal vent fields in the Okinawa Trough (E  
107 126°53'50.247", N 27°47'11.096"; E 124°22'24.86", N 25°15'47.438") in July of 2018  
108 as described previously [26]. In order to understand the abundance of Chloroflexi  
109 phylum in the deep-sea sediments, we selected eight sedimentary samples (six cold  
110 seep samples including RPC, ZC1, ZC2, ZC3, ZC4 and ZC5 at depth intervals of 0-10,  
111 30-50, 90-110, 150-170, 210-230 and 230-250 cm, respectively; two hydrothermal  
112 vents samples including H1 and H2 at depth intervals of 0-20 cm) for OTUs  
113 sequencing performed by Novogene (Tianjin, China). Briefly, total DNAs from these  
114 samples were extracted by the CTAB/SDS method [29] and diluted to 1 ng/μL with  
115 sterile water and used for PCR template. 16S rRNA genes of distinct regions (16S  
116 V3/V4) were amplified using specific primers (341F: 5'-  
117 CCTAYGGGRBGCASCAG and 806R: 5'- GGACTACNNGGGTATCTAAT). The  
118 PCR products were purified with a Qiagen Gel Extraction Kit (Qiagen, Germany) for  
119 libraries construction. Sequencing libraries were generated using TruSeq® DNA  
120 PCR-Free Sample Preparation Kit (Illumina, USA) following the manufacturer's  
121 instructions. The library quality was assessed on the Qubit® 2.0 Fluorometer  
122 (Thermo Scientific, USA) and Agilent Bioanalyzer 2100 system. The library was  
123 sequenced on an Illumina NovaSeq platform and 250 bp paired-end reads were  
124 generated. Paired-end reads were merged using FLASH (V1.2.7,

125 <http://ccb.jhu.edu/software/FLASH/>) [30], which was designed to merge paired-end  
126 reads when at least some of the reads overlap with those generated from the opposite  
127 end of the same DNA fragments, and the splicing sequences were called raw tags.  
128 Quality filtering on the raw tags was performed under specific filtering conditions to  
129 obtain the high-quality clean tags [31] according to the QIIME (V1.9.1,  
130 [http://qiime.org/scripts/split\\_libraries\\_fastq.html](http://qiime.org/scripts/split_libraries_fastq.html)) quality controlled process. The tags  
131 were compared with the reference database (Silva database, <https://www.arb-silva.de/>)  
132 using UCHIME algorithm (UCHIME Algorithm,  
133 [http://www.drive5.com/usearch/manual/uchime\\_algo.html](http://www.drive5.com/usearch/manual/uchime_algo.html)) [32] to detect chimera  
134 sequences, and then the chimera sequences were removed [33]. Sequence analyses  
135 were performed by Uparse software (Uparse v7.0.1001, <http://drive5.com/uparse/>)  
136 [34]. Sequences with  $\geq 97\%$  similarity were assigned to the same OTUs. The  
137 representative sequence for each OTU was screened for further annotation. For each  
138 representative sequence, the Silva Database (<http://www.arb-silva.de/>) [35] was used  
139 based on Mothur algorithm to annotate taxonomic information.

#### 140 **Metagenomic sequencing, assembly, binning and annotation**

141 To understand the common characteristics of Chloroflexi in deep-sea environments,  
142 four cold seep sediment samples (zhu, C1, C2 and C4) and two hydrothermal vents  
143 sediment samples (H1 and H2) were selected for metagenomic analysis in BGI (BGI,  
144 China). Briefly, total DNAs from these samples (20 g each) were extracted using the  
145 Qiagen DNeasy® PowerSoil® Pro Kit (Qiagen, Hilden, Germany) and the integrity of

146 DNA was evaluated by gel electrophoresis. Then 0.5  $\mu$ g DNA of each sample was  
147 used library construction. The library was prepared with an amplification step for  
148 each sample. And then DNAs were cleaved into 50~800 bp fragments by the Covaris  
149 E220 ultrasonicator (Covaris, Brighton, UK) and some fragments between 150~250  
150 bp were selected using AMPure XP beads (Agencourt, USA) and repaired using T4  
151 DNA polymerase (Enzymatics, USA). All next-generation sequencing (NGS) was  
152 performed on the BGISEQ-500 platform (BGI, Qingdao, China) and generated 100 bp  
153 paired-end raw reads. Quality control was performed by SOAPnuke (v1.5.6) (setting:  
154 -l 20 -q 0.2 -n 0.05 -Q 2 -d -c 0 -5 0 -7 1) [36] and the clean data were assembled  
155 using MEGAHIT (v1.1.3) (setting:--min-count 2 --k-min 33 --k-max 83 --k-step 10)  
156 [37]. Assemblies of these samples were automatically binned using Maxbin2 [38],  
157 metaBAT2 [39] and Concoct [40]. MetaWRAP [41] was used to purify and organize  
158 data to generate the final bins. Finally, the completeness and contamination of  
159 metagenome-assembled genomes (MAGs) were assessed by the checkM (v1.0.18)  
160 [42]. These obtained MAGs were subsequently annotated by searching these  
161 predicted genes against KEGG (Release 87.0), NR (20180814), Swissprot  
162 (release-2017\_07) and COG (update-2018\_08) databases. Additionally, we utilized a  
163 custom hmmer as well as the Pfam and TIGRFAM databases to search for genes  
164 associated with sulfur metabolism using hmmsearch (e-value cut-off of 1e-20) [43].

## 165 **Enrichment and cultivation of deep-sea Chloroflexi bacteria**



166 To enrich the Chloroflexi bacteria, deep-sea sediment samples were cultured at 28 °C  
167 for one month in an anaerobic enrichment medium (containing 1.0 g/L NH<sub>4</sub>Cl, 1.0 g/L  
168 NaHCO<sub>3</sub>, 1.0 g/L CH<sub>3</sub>COONa, 0.5 g/L KH<sub>2</sub>PO<sub>4</sub>, 0.2 g/L MgSO<sub>4</sub>·7H<sub>2</sub>O, 1.0 g/L yeast  
169 extract, 1.0 g/L peptone, 0.7 g/L cysteine hydrochloride, 500 µL/L 0.1 % (w/v)  
170 resazurin, pH 7.0) with 50 µg/mL rifampicin. This medium was prepared  
171 anaerobically as previously described and named ORG in this study [44]. A 50 µL  
172 enrichment culture was spread on the Hungate tubes containing ORG broth  
173 supplemented with 15 g/L agar after 10,000 times dilution. These Hungate tubes were  
174 anaerobically incubated at 28 °C for 7 days. Individual colonies were respectively  
175 picked using sterilized bamboo sticks and then cultured in the ORG broth. Strain  
176 ZRK33 was isolated and purified by repeated use the Hungate roll-tube methods for  
177 several rounds until it was considered to be axenic. The purity of strain ZRK33 was  
178 confirmed by transmission electron microscopy (TEM) and repeated partial  
179 sequencing of the 16S rRNA gene. Strain ZRK33 was preserved at -80 °C in ORG  
180 broth supplemented with 20% (v/v) glycerol.

### 181 **TEM observation**

182 To observe the morphological characteristics of strain ZRK33, the cell suspension of  
183 fresh culture was collected at 5,000 ×g for 10 min and washed with Milli-Q water,  
184 and then taken by immersing copper grids coated with a carbon film for 10 min.  
185 Thereafter, the copper grids were washed for 10 min in Milli-Q water and dried for 20  
186 min at room temperature [45]. Ultrathin-section electron microscopic observation was

187 performed as described previously [46-48]. The sample was firstly preserved in 2.5%  
188 (v/v) glutaraldehyde for 8 h at 4 °C, washed three times with phosphate buffer saline  
189 (PBS) and then dehydrated in ethanol solutions of 30%, 50%, 70%, 90% and 100%  
190 for 10 min each time. Finally, the sample was embedded in a plastic resin. Ultrathin  
191 sections (50~70 nm) of cells were prepared with an ultramicrotome (Leica EM UC7,  
192 Gemany), stained with uranyl acetate and lead citrate. All of these samples were  
193 examined using TEM (HT7700, Hitachi, Japan) with a JEOL JEM 12000 EX  
194 (equipped with a field emission gun) at 100 kV.

#### 195 **Genome sequencing and genomic analysis**

196 Genomic DNAs of strain ZRK33 were extracted from 2 L cells that cultured for 7  
197 days at 28 °C. The DNA library was prepared using the Ligation Sequencing Kit  
198 (SQK-LSK109, UK), and sequenced using a FLO-MIN106 vR9.4 flow-cell for 48 h  
199 on MinKNOWN software v1.4.2 (Oxford Nanopore Technologies, UK).  
200 Whole-genome sequence determinations of strain ZRK33 were carried out with the  
201 Oxford Nanopore MinION (Oxford, UK) and Illumina MiSeq sequencing platform  
202 (San Diego, CA). A hybrid approach was utilized for genome assembly using reads  
203 from both platforms. Base-calling was performed using Albacore software v2.1.10  
204 (Oxford Nanopore Technologies, UK). Nanopore reads were processed using  
205 protocols toolkit for quality control and downstream analysis [49]. Filtered reads were  
206 assembled using Canu version 1.8 [50] with the default parameters for Nanopore data.

207 Finally, the genome was assembled into a single contig and was manually circularized  
208 by deleting an overlapping end.

209 The genome relatedness values were calculated by multiple approaches: Average  
210 Nucleotide Identity (ANI) based on the MUMMER ultra-rapid aligning tool (ANIm),  
211 ANI based on the BLASTN algorithm (ANIb), the tetranucleotide signatures (Tetra),  
212 and *in silico* DNA-DNA similarity. ANIm, ANIb and Tetra frequencies were  
213 calculated using JSpecies WS (<http://jspecies.ribohost.com/jspeciesws/>) [51]. The  
214 recommended species criterion cut-offs were used: 95% for the ANIb and ANIm and  
215 0.99 for the Tetra signature. The *in silico* DNA-DNA similarity values were  
216 calculated by the Genome-to-Genome Distance Calculator (GGDC)  
217 (<http://ggdc.dsmz.de/>) [52]. The *isDDH* results were based on the recommended  
218 formula 2, which is independent of genome size.

## 219 **Phylogenetic analysis**

220 The full-length 16S rRNA gene sequence (1,489 bp) of strain ZRK33 was extracted  
221 from the genome, which had been deposited in the GenBank database (accession  
222 number MN817941), and other related taxa used for phylogenetic analysis were  
223 obtained from NCBI ([www.ncbi.nlm.nih.gov/](http://www.ncbi.nlm.nih.gov/)). The genome tree was constructed  
224 from a concatenated alignment of 37 protein-coding genes [53] that extracted from  
225 each genome by Phylosift (v1.0.1) [54], all of which were in a single copy and  
226 universally distributed in both archaea and bacteria (Supplementary Table S1). The  
227 genomes used to construct the genome tree included both draft and finished genomes

228 from the NCBI databases. The RpoB and EF-tu tree was constructed by using RpoB  
229 or EF-tu protein sequences, which were identified from 49 genomes using the hidden  
230 markov models (HMMs) TIGR02029 and TIGR00485 from TIGRfams  
231 (<http://www.jcvi.org/cgi-bin/tigrfams/index.cgi>), respectively. Phylogenetic trees  
232 were constructed by using W-IQ-TREE web server (<http://iqtree.cibiv.univie.ac.at>)  
233 [55] with LG+F+I+G4 model. The online tool Interactive Tree of Life (iTOL v5)  
234 [56,57] was used for editing trees.

### 235 **Growth assays of strain ZRK33**

236 Growth assays were performed at atmospheric pressure. Briefly, 15 mL fresh strain  
237 ZRK33 culture was inoculated in 2 L Hungate bottles containing 1.5 L ORG broth  
238 supplemented with 20 mM Na<sub>2</sub>SO<sub>4</sub>, 200 mM Na<sub>2</sub>SO<sub>4</sub>, 20 mM Na<sub>2</sub>S<sub>2</sub>O<sub>3</sub>, 200 mM  
239 Na<sub>2</sub>S<sub>2</sub>O<sub>3</sub>, 1 mM Na<sub>2</sub>SO<sub>3</sub> and 1 mM Na<sub>2</sub>S, respectively. Each condition had three  
240 replicates. These Hungate bottles were then anaerobically incubated at 28 °C for 12 d.  
241 Bacterial growth status was monitored by measuring the OD<sub>600</sub> value every 12 h until  
242 cell growth reached the stationary phase. For the morphological observation of strain  
243 ZRK33, we took 20 µL culture that cultivated for 12 d, which was then checked and  
244 recorded under an inverted microscope (NIKON TS100, Tokyo, Japan) equipped with  
245 a digital camera. For the determination of the dynamics of the concentrations of  
246 Na<sub>2</sub>SO<sub>4</sub> and Na<sub>2</sub>S<sub>2</sub>O<sub>3</sub> in the culture, we selected three cultivation time points at 5 d, 8  
247 d and 12 d, respectively, and each condition had three replicates. The supernatant was  
248 collected at 12,000 g for 10 min and diluted 80 times, and the concentrations of SO<sub>4</sub><sup>2-</sup>

249 and  $S_2O_3^{2-}$  in the diluted supernatant were respectively measured by the ion  
250 chromatograph (ECO IC, Herisau, Switzerland) with an chromatographic column  
251 (Metrosep A Supp5). The column was eluted with mobile phase A (3.2 mmol/L  
252  $Na_2CO_3$ ) and mobile phase B (1.0 mmol/L  $NaHCO_3$ ) at 25 °C.

### 253 **Proteomic analysis**

254 Proteomic analysis was performed by PTMBiolabs (Hangzhou, China). Briefly, strain  
255 ZRK33 was respectively cultivated in the ORG broth (set as the control group and  
256 indicated as “C”), ORG broth supplemented with 200 mM  $Na_2SO_4$  (set as the  
257 experimental group and indicated as “S”) and 200 mM  $Na_2S_2O_3$  (set as the  
258 experimental group and indicated as “T”) for 8 d at 28 °C. Then the cells were  
259 collected and sonicated three times on ice using a high intensity ultrasonic processor  
260 in lysis buffer (8 M urea, 1% Protease Inhibitor Cocktail). The remaining debris was  
261 removed by centrifugation at 12,000 g at 4 °C for 10 min. Finally, the supernatant was  
262 collected and the protein concentration was determined with a BCA kit (Solarbio,  
263 China) according to the instructions. The detailed protocols of proteomics sequencing  
264 technology were described in the Supplementary information. The heat map was  
265 made by HemI 1.0 based on the KEGG enrichment results.

### 266 **Data availability**

267 The raw amplicon sequencing data have been deposited to NCBI Short Read Archive  
268 (accession numbers: PRJNA675395 and PRJNA688815). The BioProject accession  
269 number of metagenome-assembled genomes (MAGs) of Chloroflexi bacteria used in

270 this study is PRJNA667788. The full-length 16S rRNA gene sequence of *S.*  
271 *methaneseepsis* ZRK33 has been deposited at GenBank under the accession number  
272 MN817941. The complete genome sequence of *S. methaneseepsis* ZRK33 has been  
273 deposited at GenBank under the accession number CP051151. The mass spectrometry  
274 proteomics data have been deposited to the Proteome Xchange Consortium with the  
275 dataset identifier PXD023380.

## 276 **Results**

### 277 **Chloroflexi bacteria possess high abundance in the deep-sea environments**

278 To gain preliminary insights of Chloroflexi bacteria existing in the deep-sea  
279 environments, OTUs sequencing was firstly performed to detect the abundance of the  
280 phylum Chloroflexi present in the cold seep sediments at depth intervals of 0-10 cm  
281 (sample RPC), 30-50 cm (sample ZC1), 90-110 cm (sample ZC2), 150-170 cm  
282 (sample ZC3), 210-230 cm (sample ZC4), 230-250 cm (sample ZC5) and  
283 hydrothermal vents sediments at depth intervals of 0-20 cm from the surface to the  
284 deep layer in two different sampling sites (samples H1 and H2). As previously  
285 reported [2,6,7], the Chloroflexi group was both the second most abundant phylum in  
286 cold seep and hydrothermal vents sediments, suggesting Chloroflexi was dominant in  
287 these deep-sea regions (Figs. 1A and 1B). The proportion of Chloroflexi respectively  
288 accounted for 6.15%, 10.92%, 5.04%, 8.67% and 13.67% of the whole bacterial  
289 domain at the phylum level in samples RPC, ZC1, ZC2, H1 and H2 (Figs. 1A and 1B).

290 Moreover, the ratio of the phylum Chloroflexi to the whole bacteria domain is much  
291 higher in the top layer than that in the bottom one, providing a preliminary hint of  
292 distribution of Chloroflexi bacteria in the deep-sea sediments. To obtain further  
293 insights into the deep-sea Chloroflexi bacteria, we analyzed the abundance of  
294 Chloroflexi members at the class level and found that Dehalococcoidia and  
295 Anaerolineae were the top two classes in the cold seep (Fig. 1C) and hydrothermal  
296 vents sediments (Fig. 1D). In particular, Dehalococcoidia class bacteria are an  
297 absolute dominant population in 7 of 8 samples, strongly suggesting the importance of  
298 this lineage in deep-sea environments.

### 299 **Cultivation and morphology of a novel Chloroflexi bacterium isolated from the** 300 **deep-sea cold seep**

301 To culture novel isolates belonging to the phylum Chloroflexi from deep-sea  
302 environments, we improved the enrichment method by using a specific medium that  
303 constantly supplemented with 50 µg/mL rifampicin, given that many members of  
304 Chloroflexi were reported to tolerate rifampicin [13,23] while most of other bacteria  
305 are sensitive to this antibiotics. Using this strategy, we anaerobically enriched the  
306 deep-sea sediment samples at 28 °C for one month. Thereafter, the enriched samples  
307 were plated on solid medium in Hungate tubes, and individual colonies with distinct  
308 morphology were picked and cultured (Fig. 2A). Excitingly, some of the cultured  
309 colonies were identified as Chloroflexi bacteria based on their 16S rRNA sequences.  
310 Among them, strain ZRK33 possessed a fast growth rate and was chosen for further

311 study. Under TEM observation, the cells of strain ZRK33 were filamentous, generally  
312 more than 20  $\mu\text{m}$  long and 0.5-0.6  $\mu\text{m}$  wide, and had no flagellum (Figs. 2B and 2C).  
313 Ultrathin sections of whole cells of strain ZRK33 revealed a cytoplasmic membrane  
314 surrounded by a cell wall surface layer (Figs. 2D and 2E). The strain did not possess a  
315 clearly visible sheath-like structure (Fig. 2D) as shown in the *Pelolinea submarina*  
316 strain MO-CFX1<sup>T</sup>, a typical Chloroflexi bacterium belonging to the class  
317 Anaerolineae [23]. Based on the 16S rRNA sequence of strain ZRK33, a sequence  
318 similarity calculation using the NCBI server indicated that the closest relatives of  
319 strain ZRK33 were *Anaerolinea thermophila* UNI-1 (82.75%) (class Anaerolineae),  
320 *Ornatilinea apprima* P3M-1 (82.32%) (class Anaerolineae), *Thermomarinilinea*  
321 *lacunifontana* SW7 (82.42%) (class Anaerolineae) and *Caldilinea aerophila* DSM  
322 14535 (81.87%) (class Cadilineae). Recently, taxonomic thresholds based on 16S  
323 rRNA gene sequence identity values were suggested [58]: for classes, the proposed  
324 thresholds for median and minimum sequence identity values were 86.35% and  
325 80.38%, respectively. Based on these criteria, we propose that strain ZRK33 might be  
326 a representative of a novel class-level Chloroflexi.

### 327 **Genomic characteristics and phylogenetic analysis of strain ZRK33**

328 To understand more characteristics of strain ZRK33, its whole genome was sequenced  
329 and analyzed. The genome size of strain ZRK33 was 5,631,885 bp with a DNA G+C  
330 content of 52.76% (Fig. 3A and Supplementary Table S2). Annotation of the genome  
331 of strain ZRK33 revealed it consisted of 4,885 predicted genes that included 55 RNA



332 genes (6 rRNA genes, 46 tRNA genes and 3 other ncRNAs). When exploring the  
333 detailed genomic composition of strain ZRK33, we found that various genes encoding  
334 key enzymes responsible for sulfur metabolism existing in the genome of ZRK33 (Fig.  
335 3B). And these enzymes are thought to involve in assimilatory sulfate reduction,  
336 strongly indicating that strain ZRK33 might be a representative of a novel clade that  
337 driving deep-sea sulfur cycling.

338 To further clarify the phylogenetic position of strain ZRK33, the genome  
339 relatedness values were calculated by the average nucleotide identity (ANI), *in silico*  
340 DNA-DNA similarity (*is*DDH) and the tetranucleotide signatures (Tetra), against six  
341 genomes (strain ZRK33, and five strains MO-CFX2, MO-CFX1, UNI-1, IMO-1 and  
342 P3M-1 belonging to class Anaerolineae) (Supplementary Table S3). The average  
343 nucleotide identities (ANIB) of ZRK33 with strains MO-CFX2, MO-CFX1, UNI-1,  
344 IMO-1 and P3M-1 were 64.81%, 63.06%, 63.42%, 63.41% and 63.29%, respectively.  
345 The average nucleotide identities (ANIm) of ZRK33 with MO-CFX2, MO-CFX1,  
346 UNI-1, IMO-1 and P3M-1 were 85.21%, 82.63%, 83.42%, 83.15% and 83.23%,  
347 respectively. The tetra values of ZRK33 with MO-CFX2, MO-CFX1, UNI-1,  
348 IMO-1 and P3M-1 were 0.48145, 0.67572, 0.64677, 0.65234 and 0.65126. Based on  
349 digital DNA-DNA hybridization employing the Genome-to-Genome Distance  
350 Calculator GGDC, the *in silico* DDH estimates for ZRK33 with MO-CFX2,  
351 MO-CFX1, UNI-1, IMO-1 and P3M-1 were 23.30%, 24.20%, 20.40%, 21.60% and  
352 23.80%, respectively. These results together demonstrated the genome of strain

353 ZRK33 to be obviously below established ‘cut-off’ values (ANIb: 95%, ANIm: 95%,  
354 isDDH: 70%, Tetra: 0.99) for defining bacterial species, suggesting strain ZRK33  
355 represents a novel taxon within the phylum Chloroflexi as currently defined.

356 To further confirm the taxonomic status of strain ZRK33, we performed the  
357 phylogenetic analyses with 16S rRNA genes from all cultured Chloroflexi  
358 representatives, some uncultured SAR202 representatives and other uncultured  
359 Chloroflexi bacteria. The maximum likelihood tree of 16S rRNA placed strain ZRK33  
360 as a sister of the strain MO-CFX2, which together formed a distinct cluster separating  
361 from other classes of the phylum Chloroflexi (Fig. 4). Furthermore, the genome tree  
362 also placed the novel clade as a sister of the Anaerolineae class belonging to the  
363 phylum Chloroflexi (Supplementary Figure S1). The phylogenetic analysis of strain  
364 ZRK33 using the beta subunit of RNA polymerase (RpoB), which also showed that  
365 the novel clade formed a separate branch from the Anaerolineae class (Supplementary  
366 Figure S2). More importantly, the broader phylogeny of elongation factor Tu (EF-Tu)  
367 supported the placement of the novel clade within the phylum Chloroflexi  
368 (Supplementary Figure S3). Based on phylogenetic, genomic and phenotypic  
369 characteristics, we proposed that strain ZRK33 together with strain MO-CFX2  
370 (previously classified as a representative of a novel order of class Anaerolineae ) were  
371 classified as the type strains of a new class of the phylum Chloroflexi. Given the  
372 broad distribution of genes associated with sulfur metabolism in the genome of strain  
373 ZRK33 (Fig. 3B) and its significant potential involved in sulfur cycling, we propose

374 Sulfochloroflexia classis nov., Sulfochloroflexales ord. nov., Sulfochloroflexaceae  
375 fam. nov. and *Sulfochloroflexus methaneseepsis* gen. nov.

376 **Description of *Sulfochloroflexus* gen. nov. and *Sulfochloroflexus methaneseepsis***  
377 **sp. nov.**

378 *Sulfochloroflexus* (Sul.fo'ch.lo.ro.fle.xus. N.L. fem. pl. n. Sulfo, sulfur; N.L. masc.  
379 *chloroflexus* a bacterial genus; N.L. masc. n. *Sulfochloroflexus*, *chloroflexus* sulfur  
380 loving. Facultatively anaerobic, mesophilic, neutrophilic and moderately halophilic  
381 (Supplementary Table S2). Cells are non-motile. Gram-staining reaction is negative.  
382 The phylogenetic position is in the family Sulfochloroflexaceae, order  
383 Sulfochloroflexales, class Sulfochloroflexia of the phylum Chloroflexi. The type  
384 species is *Sulfochloroflexus methaneseepsis*.

385 *Sulfochloroflexus methaneseepsis* (me.th.ane'seep.sis. L. gen. pl. n.  
386 *methaneseepsis* of the deep-sea methane seeps). Cells are generally more than 20 µm  
387 long and 0.5-0.6 µm wide, filamentous, facultatively anaerobic and have no flagellum.  
388 From the sole carbon source utilization test, growth is stimulated by arabinose,  
389 fructose, glucose, galactose, mannose, ribose, fumarate, pyruvate and peptone.  
390 Growing at pH values of 6.0-8.0 (optimum, pH 7.0). The temperature range for  
391 growth is 28-32 °C with an optimum at 28 °C. Growth occurs at NaCl concentrations  
392 between 0.0-5.0% with optimum growth at 3.0% NaCl. Containing significant  
393 proportions (>10 %) of the cellular fatty acids C<sub>16:0</sub>, C<sub>15:0</sub>2-OH, C<sub>17:1</sub>ω6c and C<sub>18:1</sub>ω7c.

394 The type strain, ZRK33<sup>T</sup>, was isolated from the sediment of deep-sea cold seep, P.R.  
395 China. The DNA G+C content of the type strain is 52.76%.

396 The detailed descriptions of other levels of Sulfochloroflexia were shown in the  
397 Supplementary information.

### 398 ***S. methaneseepsis* ZRK33 assimilates sulfate and thiosulfate for growth**

399 Given that strain ZRK33 had a complete set genes of assimilatory sulfate reduction  
400 and it was isolated from the deep-sea cold seep where is rich of different  
401 sulfur-containing compounds [25,26], thus, we tested the effects of different  
402 sulfur-containing inorganic substances (including Na<sub>2</sub>SO<sub>4</sub>, Na<sub>2</sub>SO<sub>3</sub>, Na<sub>2</sub>S<sub>2</sub>O<sub>3</sub>, Na<sub>2</sub>S)  
403 on the growth of *S. methaneseepsis* ZRK33. The results showed that the supplement  
404 of high concentration (200 mM) of Na<sub>2</sub>SO<sub>4</sub> and Na<sub>2</sub>S<sub>2</sub>O<sub>3</sub> could significantly promote  
405 the growth of strain ZRK33 (Figs. 5A and B). While low concentration of Na<sub>2</sub>SO<sub>4</sub> and  
406 Na<sub>2</sub>S<sub>2</sub>O<sub>3</sub> (20 mM) had no evident effects on the growth of strain ZRK33  
407 (Supplementary Fig. S4), indicating this bacterium is only sensitive to high  
408 concentrations of Na<sub>2</sub>SO<sub>4</sub> and Na<sub>2</sub>S<sub>2</sub>O<sub>3</sub>. Meanwhile, it is noting that the  
409 concentrations of Na<sub>2</sub>SO<sub>4</sub> and Na<sub>2</sub>S<sub>2</sub>O<sub>3</sub> were respectively decreased from 200 mM to  
410 120 mM and 140 mM along with the growth of strain ZRK33 for 12 d, suggesting that  
411 strain ZRK33 could effectively metabolize Na<sub>2</sub>SO<sub>4</sub> and Na<sub>2</sub>S<sub>2</sub>O<sub>3</sub> (Figs. 5A and B).  
412 Moreover, the average length of filamentous cells of strain ZRK33 became apparently  
413 longer in the medium supplemented with 200 mM Na<sub>2</sub>SO<sub>4</sub> (Fig. 5D) or Na<sub>2</sub>S<sub>2</sub>O<sub>3</sub> (Fig.  
414 5E) than that in the control group (Fig. 5C), strongly suggesting that ZRK33 could

415 assimilate  $\text{Na}_2\text{SO}_4$  and  $\text{Na}_2\text{S}_2\text{O}_3$  and thereby generating extra energy for growth. In  
416 comparison, the supplement of very low concentration (1 mM) of  $\text{Na}_2\text{SO}_3$  and  $\text{Na}_2\text{S}$   
417 inhibited the growth of strain ZRK33 (Supplementary Fig. S4), indicating that  $\text{SO}_3^{2-}$   
418 and  $\text{S}^{2-}$  were harmful sulfur-containing compounds against the growth of strain  
419 ZRK33.

### 420 **Proteomic analyses of sulfur metabolism in *S. methaneseepsis* ZRK33**

421 To better describe the sulfur metabolism of *S. methaneseepsis* ZRK33, we performed  
422 the proteomic analysis of strain ZRK33 that cultured in the medium amended with or  
423 without  $\text{Na}_2\text{SO}_4/\text{Na}_2\text{S}_2\text{O}_3$  to explore the underlying mechanism of growth promotion,  
424 given that ZRK33 could effectively assimilate  $\text{Na}_2\text{SO}_4/\text{Na}_2\text{S}_2\text{O}_3$  for its growth. The  
425 results showed that the expression of sulfurtransferase (TST), sulfatase-like hydrolase  
426 and cysteine desulfurase-like protein were obviously up-regulation compared with the  
427 control group, which were associated with sulfur metabolism (Fig. 6A). In particular,  
428 TST is a key enzyme catalyzing  $\text{S}_2\text{O}_3^{2-}$  to  $\text{SO}_3^{2-}$  and thereby joining into sulfur  
429 assimilation (Fig. 3B), and it was significantly up-regulated in the presence of high  
430 concentrations of  $\text{Na}_2\text{SO}_4/\text{Na}_2\text{S}_2\text{O}_3$ , especially  $\text{Na}_2\text{S}_2\text{O}_3$ . Surprisingly, the expressions  
431 of other proteins associated with assimilatory sulfate reduction were not significantly  
432 up-regulated in experimental groups, partly due to the single sampling time point that  
433 might miss the exact time to detect the up-regulation of key proteins associated with  
434 sulfur metabolism. Alternatively, the expressions of many proteins associated with  
435 organic matter metabolisms toward energy production were evidently up-regulated,

436 including amino acids and sugar ABC transporters (Fig. 6B),  
437 saccharides/peptides/amino acids degradation (Fig. 6C), and energy production (Fig.  
438 6D). Correspondingly, the expressions of almost all genes involved in EMP glycolysis  
439 were also significantly up-regulated (Supplementary Figures S5). Thus, we speculated  
440 that metabolization of sulfate and thiosulfate by strain ZRK33 may accelerate the  
441 hydrolysis and uptake of saccharides and other organic matter and thereby  
442 synthesizing energy to promote the growth [48]. Combining the results of catalyzing  
443 of sulfate and thiosulfate to other formations (Figs. 5C and 5D), we believe that strain  
444 ZRK33 possesses a capability to assimilate inorganic sulfur-containing compounds  
445 (e.g. sulfate and thiosulfate) that ubiquitously existing in the deep-sea environments  
446 and thereby contributing to the deep-sea sulfur cycling to some extent.

447 Based on the combination of proteomic, genomic and physiological  
448 characteristics, we propose a model towards central metabolic traits of strain ZRK33  
449 (Fig. 7). In this model, central metabolisms including EMP glycolysis, oxidative  
450 pentose phosphate pathway, TCA cycle (tricarboxylic acid cycle), assimilatory sulfate  
451 reduction, urea cycle and electron transport system are shown. All the above items are  
452 closely related to the energy production in strain ZRK33. Briefly, strain ZRK33  
453 contains a number of genes related to ABC transporters of amino acids, peptides and  
454 sugar, which could transport these organic matters into the cell to participate in EMP  
455 glycolysis and oxidative pentose phosphate pathway. These processes eventually  
456 drive the formation of pyruvate and acetyl-CoA, which enter the TCA cycle to

457 produce energy for the growth of strain ZRK33. Of note, sulfate and thiosulfate could  
458 be converted to cysteine and thereby entering the pyruvate synthesis pathway through  
459 the assimilatory sulfate reduction, which might promote the saccharides degradation  
460 and utilization via some unknown mechanisms. Moreover, strain ZRK33 could fix  
461 nitrogen and carbon dioxide to involve in the urea cycle, and corresponding  
462 metabolites can join into the TCA cycle for energy generation. Meanwhile, the F-type  
463 ATP synthase, cytochrome bd ubiquinol oxidase and H<sup>+</sup>-transporting NADH:  
464 Quinone oxidoreductase required for energy production are also present in the  
465 genome of strain ZRK33. Overall, *S. methaneseepsis* ZRK33 is a representative of a  
466 novel clade of the phylum Chloroflexi that possessing diverse metabolic pathways for  
467 energy production, providing an evidence that Chloroflexi members are a group of  
468 high-abundance bacteria ubiquitously distributed in different environments.

469 **Wide distribution of assimilatory and dissimilatory sulfate reduction pathways in**  
470 **the deep-sea Chloroflexi bacteria**

471 To evaluate the contribution of Chloroflexi bacteria to the deep-sea sulfur cycling, we  
472 further analyzed the distribution of genes encoding key enzymes responsible for both  
473 assimilatory (Fig. 8A) and dissimilatory (Fig. 8B) sulfate reduction in 27  
474 metagenome-assembled genomes (MAGs) of Chloroflexi bacteria derived from both  
475 deep-sea cold seep and hydrothermal vents sediments. Through a thorough analysis of  
476 27 MAGs, we found that diverse genes encoding key enzymes in charge of  
477 assimilatory and dissimilatory sulfate reduction, including adenylyl-sulfate kinase

478 (CysC), 3', 5'-bisphosphate nucleotidase (CysQ), sulfate adenylyltransferase (CysN),  
479 anaerobic sulfite reductase (AsrA, AsrB and AsrC) and dissimilatory sulfite reductase  
480 (DsrA and DsrB), were widely distributed in both cold seep and hydrothermal vents  
481 derived MAGs (Fig. 8C). Of note, genes encoding AsrA and AsrB were present in  
482 most MAGs, however, genes encoding DsrA and DsrB only broadly existed in the  
483 hydrothermal vents-derived MAGs (Fig. 8C). DsrA and DsrB are typical symbols of  
484 microbes mediating dissimilatory sulfate reduction [4]. Therefore, we propose  
485 dissimilatory sulfate reduction might be often adopted by the members of Chloroflexi  
486 in the hydrothermal vents. Nonetheless, Chloroflexi bacteria should be important  
487 participants in sulfur cycling in the deep-sea environments, given their high  
488 abundance in both cold seep and hydrothermal vents.

## 489 **Discussion**

490 Microorganisms in the deep marine subsurface sediments represent a large unexplored  
491 biosphere, exploring and resolving their metabolisms are essential to understand the  
492 global biogeochemical cycles [59-61]. Despite the global importance of these  
493 microorganisms, deep-sea sediments are among the least understood environments,  
494 partly due to the difficulty of sampling as well as the complexity of inhabiting  
495 communities [59]. With this, the majority of deep-sea microbial diversity remains  
496 uncultured, hampering a more thorough understanding of their unique biology  
497 [3,59,62]. One of the striking characteristics of these uncultured lineages is that most  
498 of them are dominant population, for example, the large proportion of uncultured



499 microbes was estimated to make up more than 75% of sediment genera [63].  
500 Therefore, it is crucial to increase our capability for bringing microorganisms from  
501 the environment into culture [60], which will advance our understanding of their  
502 global biogeochemical cycles [48]. Among the uncultured majorities, the phylum  
503 Chloroflexi is ubiquitous and often abundant in sediments, soils and wastewater  
504 treatment systems, as well as in deep-sea extreme environments [64].

505       Indeed, our OTUs sequencing results clearly show that the abundance of the  
506 phylum Chloroflexi is both the second most in the domain Bacteria that living in the  
507 cold seep and hydrothermal vents sediments (Figs. 1A and 1B). Although Chloroflexi  
508 bacteria are widespread on Earth, the puzzling thing is the extreme difficulty to  
509 culture Chloroflexi members from various environments, leading to a poor  
510 understanding with regard to their unique metabolisms that endowing them with  
511 tremendous vitality. Therefore, it is an urgent need to obtain more uncultivated  
512 isolates for better resolving their diversity and ecological roles, especially from the  
513 deep-sea environments given their potentials to participate in sulfur cycling [4,28].  
514 When we looked through the previously reported characteristics of Chloroflexi  
515 isolates, one of the striking features attracted our attention: most cultured Chloroflexi  
516 could tolerate a high concentration of rifampicin (50  $\mu\text{g}/\text{mL}$ ) [13,23]. It is known that  
517 rifampicin is an effective inhibitor of DNA-dependent RNA polymerase and inhibits  
518 the growth of many bacteria [23]. Therefore, in the present study, we developed an  
519 effective enrichment method by keeping a constant rifampicin pressure in the

520 enrichment and isolation medium (Fig. 2A). Indeed, we successfully obtained a novel  
521 Chloroflexi isolate, strain ZRK33, from the cold seep samples (Fig. 2). Strikingly,  
522 strain ZRK33 possessed a very fast growth rate (4 h for doubling time) compared to  
523 other reported Chloroflexi isolates (6 h to 19 days for doubling time) (Supplementary  
524 Table S2), providing a great advantage for us to promptly perform various assays.  
525 Overall, we strongly recommend the researchers to use rifampicin as a selection  
526 pressure to enrich and culture novel isolates of Chloroflexi in the future.

527       Additionally, we proposed strain ZRK33 as a representative of a novel class of  
528 the phylum Chloroflexi. The reasons are as following: (1) strain ZRK33 showed only  
529 ~82% 16S rRNA gene identity with other cultured isolates, which meets the proposed  
530 thresholds for median (86.35%) and minimum (80.38%) sequence identity values to  
531 build a novel class [58]; (2) the phylogenetic analyses based on the genome  
532 (Supplementary Figure S1), beta RpoB (Supplementary Figure S2) and EF-Tu  
533 (Supplementary Figure S3) all support the classification of strain ZRK33 as the type  
534 strain of a new class; (3) strain ZRK33 is facultatively anaerobic, however, the  
535 Anaerolineae class bacteria are obligately anaerobic (Supplementary Table S2)[13],  
536 even though the novel clade shows the highest identity with the Anaerolineae class.  
537 Taken together, we propose strain ZRK33 together with *Aggregatilinea lenta*  
538 MO-CFX2<sup>T</sup> to represent a novel class of Chloroflexi phylum, though strain  
539 MO-CFX2<sup>T</sup> was thought to be a representative of a novel order of the class  
540 Anaerolineae [13].

541 Notably, we find that strain ZRK33 contains a complete set of genes associated  
542 with assimilatory sulfate reduction (Fig. 3B), providing potentials to involve into  
543 sulfur cycling. Therefore, we name this novel isolate as *Sulfochloroflexus*  
544 *methaneseepsis* ZRK33, which belonging to Sulfochloroflexia classis nov.,  
545 Sulfochloroflexales ord. nov., Sulfochloroflexaceae fam. nov.. The cycling of sulfur is  
546 a dominant metabolism pathway for the marine subsurface microorganisms [26,65],  
547 and deep-sea Chloroflexi bacteria were predicted to respire oxidized sulfur  
548 compounds [4] and metabolize multiple organosulfur compounds [28] based on  
549 metagenomics data. However, to date, no studies based on the pure culture have  
550 verified that Chloroflexi members indeed drive sulfur cycling of deep-sea  
551 environments. Take advantage of pure cultivation of *S. methaneseepsis* ZRK33, we  
552 verified its actual involvement of both sulfate and thiosulfate assimilatory processes  
553 (Fig. 5), and the sulfur assimilatory greatly facilitates the growth and morphogenesis  
554 of ZRK33 via promoting the transport and metabolization of saccharides and other  
555 organic matter (Fig. 6). However, strain ZRK33 only responds to high concentrations  
556 of sulfate and thiosulfate (200 mM), given the high concentrations of different  
557 sulfur-containing compounds [25,26] existing in the cold seep and some microbes  
558 possessing a capability to enrich sulfur-containing compounds (such as elemental  
559 sulfur and polysulfide [26,66]), we speculate this phenomenon is possible to happen  
560 in the deep-sea cold seep sediments.

561 Most importantly, large portion of the genes associated with assimilatory or  
562 dissimilatory sulfate reduction are widely distributed in the Chloroflexi MAGs  
563 derived from deep-sea cold seep and hydrothermal vents (Fig. 8), which strongly  
564 suggesting Chloroflexi bacteria are key players in the sulfur cycling of deep biosphere.  
565 In combination with the reports that the other two Chloroflexi lineages (SAR202  
566 group and Dehalococcoidia class) possessing potentials to drive sulfur  
567 metabolizations, it is reasonable to affirm the phylum Chloroflexi greatly contributes  
568 to the ocean sulfur cycling. Actually, we tried to check the metabolisms of strain  
569 ZRK33 that cultured in the deep-sea cold seep as performed previously [48],  
570 unfortunately, the cells of strain ZRK33 were invaded by some unknown microbes  
571 that leading the failure of *in situ* test toward its involvement of sulfur cycling. We are  
572 improving the experimental apparatus and procedure, which will greatly benefit us to  
573 check the central metabolisms of strain ZRK33 *in situ* in the near future.

## 574 **Acknowledgements**

575 This work was funded by the Major Research Plan of the National Natural Science  
576 Foundation (Grant No. 92051107), China Ocean Mineral Resources R&D Association  
577 Grant (Grant No. DY135-B2-14), Key Deployment Projects of Center of Ocean  
578 Mega-Science of the Chinese Academy of Sciences (Grant No. COMS2020Q04),  
579 Strategic Priority Research Program of the Chinese Academy of Sciences (Grant No.  
580 XDA22050301), National Key R and D Program of China (Grant No.  
581 2018YFC0310800), the Taishan Young Scholar Program of Shandong Province

582 (tsqn20161051), and Qingdao Innovation Leadership Program (Grant No.  
583 18-1-2-7-zhc) for Chaomin Sun. This study is also funded by the Open Research  
584 Project of National Major Science & Technology Infrastructure (*RV KEXUE*) (Grant  
585 No. NMSTI-KEXUE2017K01).

## 586 **Author contributions**

587 RZ and CS conceived and designed the study; RZ conducted most of the experiments;  
588 RL, YS and GL collected the samples from the deep-sea cold seep; RC helped to  
589 analyze the metagenomes; RZ and CS lead the writing of the manuscript; all authors  
590 contributed to and reviewed the manuscript.

## 591 **Conflict of interest**

592 The authors declare that there are no any competing financial interests in relation to  
593 the work described.

## 594 **References**

- 595 1. Kallmeyer J, Pockalny R, Adhikari RR, Smith DC, D'Hondt S. Global distribution  
596 of microbial abundance and biomass in subseafloor sediment. *P Natl Acad Sci USA*.  
597 (2012); 109: 16213-16216.
- 598 2. Parkes RJ, Cragg BA, Wellsbury P. Recent studies on bacterial populations and  
599 processes in subseafloor sediments: A review. *Hydrogeol J*. (2002); 10: 346-346.
- 600 3. Inagaki F, Nunoura T, Nakagawa S, Teske A, Lever M, Lauer A, et al. Biogeographical  
601 distribution and diversity of microbes in methane hydrate-bearing deep marine sediments,  
602 on the Pacific Ocean Margin. *P Natl Acad Sci USA*. (2006); 103: 2815-2820.
- 603 4. Wasmund K, Cooper M, Schreiber L, Lloyd KG, Baker BJ, Petersen DG, et al.  
604 Single-cell genome and group-specific *dsrAB* sequencing implicate marine members of  
605 the class Dehalococcoidia (Phylum Chloroflexi) in sulfur cycling. *mBio*. (2016); 7.
- 606 5. Biddle JF, Fitz-Gibbon S, Schuster SC, Brenchley JE, House CH. Metagenomic  
607 signatures of the Peru Margin subseafloor biosphere show a genetically distinct  
608 environment. *P Natl Acad Sci USA*. (2008); 105: 10583-10588.

- 609 6. Blazejak A, Schippers A. High abundance of JS-1-and Chloroflexi-related Bacteria in  
610 deeply buried marine sediments revealed by quantitative, real-time PCR. FEMS  
611 Microbiol Ecol. (2010); 72: 198-207.
- 612 7. Parkes RJ, Cragg B, Roussel E, Webster G, Weightman A, Sass H. A review of  
613 prokaryotic populations and processes in sub-seafloor sediments, including  
614 biosphere:geosphere interactions. Mar Geol. (2014); 352: 409-425.
- 615 8. Fry JC, Parkes RJ, Cragg BA, Weightman AJ, Webster G. Prokaryotic biodiversity  
616 and activity in the deep subseafloor biosphere. FEMS Microbiol Ecol. (2008); 66:  
617 181-196.
- 618 9. Speirs LBM, Rice DTF, Petrovski S, Seviour RJ. The phylogeny, biodiversity, and  
619 ecology of the Chloroflexi in activated sludge. Front Microbiol. (2019); 10.
- 620 10. Bovio P, Cabezas A, Etchebehere C. Preliminary analysis of Chloroflexi populations in  
621 full-scale UASB methanogenic reactors. J Appl Microbiol. (2019); 126: 667-683.
- 622 11. Schmitt S, Deines P, Behnam F, Wagner M, Taylor MW. Chloroflexi bacteria are  
623 more diverse, abundant, and similar in high than in low microbial abundance sponges.  
624 FEMS Microbiol Ecol. (2011); 78: 497-510.
- 625 12. Sorokin DY, Lucker S, Vejmekova D, Kostrikina NA, Kleerebezem R, Rijpstra WIC, et  
626 al. Nitrification expanded: discovery, physiology and genomics of a nitrite-oxidizing  
627 bacterium from the phylum Chloroflexi. ISME J. (2012); 6: 2245-2256.
- 628 13. Nakahara N, Nobu MK, Takaki Y, Miyazaki M, Tasumi E, Sakai S, et al. *Aggregatilinea*  
629 *lenta* gen. nov., sp. nov., a slow-growing, facultatively anaerobic bacterium isolated from  
630 subseafloor sediment, and proposal of the new order Aggregatilineales ord. nov. within  
631 the class Anaerolineae of the phylum Chloroflexi. Int J Syst Evol Micr. (2019); 69:  
632 1185-1194.
- 633 14. Gupta RS, Chander P, George S. Phylogenetic framework and molecular signatures for  
634 the class Chloroflexi and its different clades; proposal for division of the class Chloroflexi  
635 class. nov into the suborder Chloroflexineae subord. nov., consisting of the emended  
636 family Oscillochloridaceae and the family Chloroflexaceae fam. nov., and the suborder  
637 Roseiflexineae subord. nov., containing the family Roseiflexaceae fam. nov. Anton  
638 Leeuw Int J G. (2013); 103: 99-119.
- 639 15. Yamada T, Sekiguchi Y, Hanada S, Imachi H, Ohashi A, Harada H, et al. *Anaerolinea*  
640 *thermolimosa* sp nov., *Levilinea saccharolytica* gen. nov., sp nov and *Leptolinea*  
641 *tardivitalis* gen. nov., so. nov., novel filamentous anaerobes, and description of the new  
642 classes anaerolineae classis nov and Caldilineae classis nov in the bacterial phylum  
643 Chloroflexi. Int J Syst Evol Micr. (2006); 56: 1331-1340.
- 644 16. Yabe S, Aiba Y, Sakai Y, Hazaka M, Yokota A. *Thermosporothrix hazakensis* gen.  
645 nov., sp nov., isolated from compost, description of Thermosporotrichaceae fam. nov  
646 within the class Ktedonobacteria Cavaletti et al. 2007 and emended description of the  
647 class Ktedonobacteria. Int J Syst Evol Micr. (2010); 60: 1794-1801.
- 648 17. Garrity GM, Holt JG, Perry JJ. (2001) In Boone, D. R., Castenholz, R. W. and Garrity,  
649 G. M. (eds.), *Bergey's Manual® of Systematic Bacteriology: Volume One : The Archaea*

- 650        *and the Deeply Branching and Phototrophic Bacteria*. Springer New York, New York,  
651        NY, pp. 447-450.
- 652    18. Löffler FE, Yan J, Ritalahti KM, Adrian L, Edwards EA, Konstantinidis KT, et al.  
653        *Dehalococcoides mccartyi* gen. nov., sp nov., obligately organohalide-respiring anaerobic  
654        bacteria relevant to halogen cycling and bioremediation, belong to a novel bacterial class,  
655        Dehalococcoidia classis nov., order Dehalococcoidales ord. nov and family  
656        Dehalococcoidaceae fam. nov., within the phylum Chloroflexi. *Int J Syst Evol Micr.*  
657        (2013); 63: 625-635.
- 658    19. Kochetkova TV, Zayulina KS, Zhigarkov VS, Minaev NV, Chichkov BN, Novikov AA,  
659        et al. *Tepidiforma bonchosmolovskayae* gen. nov., sp. nov., a moderately thermophilic  
660        Chloroflexi bacterium from a Chukotka hot spring (Arctic, Russia), representing a novel  
661        class, Tepidiformia, which includes the previously uncultivated lineage OLB14. *Int J Syst*  
662        *Evol Micr.* (2020); 70: 1192-1202.
- 663    20. Dodsworth JA, Gevorkian J, Despujos F, Cole JK, Murugapiran SK, Ming H, et al.  
664        *Thermoflexus hugenholtzii* gen. nov., sp. nov., a thermophilic, microaerophilic,  
665        filamentous bacterium representing a novel class in the Chloroflexi, *Thermoflexia classis*  
666        nov., and description of Thermoflexaceae fam. nov. and Thermoflexales ord. nov. . *Int J*  
667        *Syst Evol Micr.* (2014); 64: 3331-3331.
- 668    21. Kawaiichi S, Ito N, Kamikawa R, Sugawara T, Yoshida T, Sako Y. *Ardenticatena*  
669        *maritima* gen. nov., sp nov., a ferric iron- and nitrate-reducing bacterium of the phylum  
670        'Chloroflexi' isolated from an iron-rich coastal hydrothermal field, and description of  
671        *Ardenticatena classis nov.* *Int J Syst Evol Micr.* (2013); 63: 2992-3002.
- 672    22. Rappe MS, Giovannoni SJ. The uncultured microbial majority. *Annu Rev Microbiol.*  
673        (2003); 57: 369-394.
- 674    23. Imachi H, Sakai S, Lipp JS, Miyazaki M, Saito Y, Yamanaka Y, et al. *Pelolinea*  
675        *submarina* gen. nov., sp nov., an anaerobic, filamentous bacterium of the phylum  
676        Chloroflexi isolated from subseafloor sediment. *Int J Syst Evol Micr.* (2014); 64:  
677        812-818.
- 678    24. Imachi H, Aoi K, Tasumi E, Saito Y, Yamanaka Y, Saito Y, et al. Cultivation of  
679        methanogenic community from subseafloor sediments using a continuous-flow bioreactor.  
680        *ISME J.* (2011); 5: 1913-1925.
- 681    25. Wasmund K, Mussmann M, Loy A. The life sulfuric: microbial ecology of sulfur  
682        cycling in marine sediments. *Env Microbiol Rep.* (2017); 9: 323-344.
- 683    26. Zhang J, Liu R, Xi SC, Cai RN, Zhang X, Sun CM. A novel bacterial thiosulfate  
684        oxidation pathway provides a new clue about the formation of zero-valent sulfur in deep  
685        sea. *ISME J.* (2020); 14: 2261-2274.
- 686    27. Fullerton H, Moyer CL. Comparative single-cell genomics of Chloroflexi from the  
687        Okinawa Trough deep-subsurface biosphere. *Appl Environ Microb.* (2016); 82:  
688        3000-3008.
- 689    28. Mehrshad M, Rodriguez-Valera F, Amoozegar MA, Lopez-Garcia P, Ghai R. The  
690        enigmatic SAR202 cluster up close: shedding light on a globally distributed dark ocean  
691        lineage involved in sulfur cycling. *ISME J.* (2018); 12: 655-668.

- 692 29. Murray MG, Thompson WF. Rapid isolation of high molecular-weight plant DNA.  
693 Nucleic Acids Res. (1980); 8: 4321-4325.
- 694 30. Magoc T, Salzberg SL. FLASH: fast length adjustment of short reads to improve genome  
695 assemblies. Bioinformatics. (2011); 27: 2957-2963.
- 696 31. Bokulich NA, Subramanian S, Faith JJ, Gevers D, Gordon JI, Knight R, et al.  
697 Quality-filtering vastly improves diversity estimates from Illumina amplicon sequencing.  
698 Nat Methods. (2013); 10: 57-U11.
- 699 32. Edgar RC, Haas BJ, Clemente JC, Quince C, Knight R. UCHIME improves  
700 sensitivity and speed of chimera detection. Bioinformatics. (2011); 27: 2194-2200.
- 701 33. Haas BJ, Gevers D, Earl AM, Feldgarden M, Ward DV, Giannoukos G, et al. Chimeric  
702 16S rRNA sequence formation and detection in Sanger and 454-pyrosequenced PCR  
703 amplicons. Genome Res. (2011); 21: 494-504.
- 704 34. Edgar RC. UPARSE: highly accurate OTU sequences from microbial amplicon reads.  
705 Nat Methods. (2013); 10: 996-998.
- 706 35. Quast C, Pruesse E, Yilmaz P, Gerken J, Schweer T, Yarza P, et al. The SILVA  
707 ribosomal RNA gene database project: improved data processing and web-based tools.  
708 Nucleic Acids Res. (2013); 41: D590-D596.
- 709 36. Chen YX, Chen YS, Shi CM, Huang ZB, Zhang Y, Li SK, et al. SOAPnuke: a  
710 MapReduce acceleration-supported software for integrated quality control and  
711 preprocessing of high-throughput sequencing data. Gigascience. (2017); 7.
- 712 37. Li DH, Liu CM, Luo RB, Sadakane K, Lam TW. MEGAHIT: an ultra-fast  
713 single-node solution for large and complex metagenomics assembly via succinct de  
714 Bruijn graph. Bioinformatics. (2015); 31: 1674-1676.
- 715 38. Wu YW, Simmons BA, Singer SW. MaxBin 2.0: an automated binning algorithm to  
716 recover genomes from multiple metagenomic datasets. Bioinformatics. (2016); 32:  
717 605-607.
- 718 39. Kang DWD, Li F, Kirton E, Thomas A, Egan R, An H, et al. MetaBAT 2: an adaptive  
719 binning algorithm for robust and efficient genome reconstruction from metagenome  
720 assemblies. Peerj. (2019); 7.
- 721 40. Alneberg J, Bjarnason BS, de Bruijn I, Schirmer M, Quick J, Ijaz UZ, et al. Binning  
722 metagenomic contigs by coverage and composition. Nat Methods. (2014); 11: 1144-1146.
- 723 41. Uritskiy GV, DiRuggiero J, Taylor J. MetaWRAP-a flexible pipeline for  
724 genome-resolved metagenomic data analysis. Microbiome. (2018); 6.
- 725 42. Parks DH, Imelfort M, Skennerton CT, Hugenholtz P, Tyson GW. CheckM:  
726 assessing the quality of microbial genomes recovered from isolates, single cells, and  
727 metagenomes. Genome Res. (2015); 25: 1043-1055.
- 728 43. Dombrowski N, Teske AP, Baker BJ. Expansive microbial metabolic versatility and  
729 biodiversity in dynamic Guaymas Basin hydrothermal sediments. Nat Commun. (2018);  
730 9.
- 731 44. Fardeau ML, Ollivier B, Patel BKC, Magot M, Thomas P, Rimbault A, et al. *Thermotoga*  
732 *hypogea* sp. nov., a xylanolytic, thermophilic bacterium from an oil-producing well. Int J  
733 Syst Bacteriol. (1997); 47: 1013-1019.



- 734 45. Buchan A, LeClerc GR, Gulvik CA, Gonzalez JM. Master recyclers: features and  
735 functions of bacteria associated with phytoplankton blooms. *Nat Rev Microbiol.* (2014);  
736 12: 686-698.
- 737 46. Sekiguchi Y, Yamada T, Hanada S, Ohashi A, Harada H, Kamagata Y.  
738 *Anaerolinea thermophila* gen. nov., sp nov and *Caldilinea aerophila* gen. nov., sp nov.,  
739 novel filamentous thermophiles that represent a previously uncultured lineage of the  
740 domain Bacteria at the subphylum level. *Int J Syst Evol Micr.* (2003); 53: 1843-1851.
- 741 47. Graham L, Orenstein JM. Processing tissue and cells for transmission electron  
742 microscopy in diagnostic pathology and research. *Nat Protoc.* (2007); 2: 2439-2450.
- 743 48. Zheng RK, Liu R, Shan YQ, Cai RN, Liu G, Sun CM. Characterization of the first  
744 cultured free-living representative of *Candidatus Izimaplasma* uncovers its unique  
745 biology. *bioRxiv.* (2020).
- 746 49. Loman NJ, Quinlan AR. Poretools: a toolkit for analyzing nanopore sequence data.  
747 *Bioinformatics.* (2014); 30: 3399-3401.
- 748 50. Koren S, Walenz BP, Berlin K, Miller JR, Bergman NH, Phillippy AM. Canu:  
749 scalable and accurate long-read assembly via adaptive k-mer weighting and repeat  
750 separation. *Genome Res.* (2017); 27: 722-736.
- 751 51. Richter M, Rossello-Mora R, Glockner FO, Peplies J. JSpeciesWS: a web server for  
752 prokaryotic species circumscription based on pairwise genome comparison.  
753 *Bioinformatics.* (2016); 32: 929-931.
- 754 52. Meier-Kolthoff JP, Auch AF, Klenk HP, Goker M. Genome sequence-based species  
755 delimitation with confidence intervals and improved distance functions. *Bmc*  
756 *Bioinformatics.* (2013); 14.
- 757 53. Wu DY, Jospin G, Eisen JA. Systematic identification of gene families for use as  
758 "markers" for phylogenetic and phylogeny-driven ecological studies of Bacteria and  
759 Archaea and their major subgroups. *Plos One.* (2013); 8.
- 760 54. Darling AE, Jospin G, Lowe E, Matsen FIV, Bik HM, Eisen JA. PhyloSift:  
761 phylogenetic analysis of genomes and metagenomes. *Peerj.* (2014); 2.
- 762 55. Trifinopoulos J, Nguyen LT, von Haeseler A, Minh BQ. W-IQ-TREE: a fast online  
763 phylogenetic tool for maximum likelihood analysis. *Nucleic Acids Res.* (2016); 44:  
764 W232-W235.
- 765 56. Letunic I, Bork P. Interactive Tree Of Life (iTOL): an online tool for phylogenetic tree  
766 display and annotation. *Bioinformatics.* (2007); 23: 127-128.
- 767 57. Letunic I, Bork P. Interactive tree of life (iTOL) v3: an online tool for the display and  
768 annotation of phylogenetic and other trees. *Nucleic Acids Res.* (2016); 44: W242-W245.
- 769 58. Yilmaz P, Parfrey LW, Yarza P, Gerken J, Pruesse E, Quast C, et al. The SILVA and  
770 "All-species Living Tree Project (LTP)" taxonomic frameworks. *Nucleic Acids Res.*  
771 (2014); 42: D643-D648.
- 772 59. Baker BJ, Appller KE, Gong X. New microbial biodiversity in marine sediments. *Ann*  
773 *Rev Mar Sci.* (2020).
- 774 60. Lewis WH, Tahon G, Geesink P, Sousa DZ, Ettema TJG. Innovations to culturing  
775 the uncultured microbial majority. *Nat Rev Microbiol.* (2020).

- 776 61. Zheng RK, Sun CM. *Sphingosinithalassobacter tenebrarum* sp. nov., isolated from a  
777 deep-sea cold seep. *Int J Syst Evol Micr.* (2020); 70: 5561-5566.
- 778 62. Henson MW, Lanclos VC, Faircloth BC, Thrash JC. Cultivation and genomics of the  
779 first freshwater SAR11 (LD12) isolate. *ISME J.* (2018); 12: 1846-1860.
- 780 63. Lloyd KG, Steen AD, Ladau J, Yin J, Crosby L. Phylogenetically novel uncultured  
781 microbial cells dominate Earth microbiomes. *mSystems.* (2018); 3.
- 782 64. Yamada T, Sekiguchi Y. Cultivation of Uncultured Chloroflexi Subphyla: Significance  
783 and Ecophysiology of Formerly Uncultured Chloroflexi 'Subphylum I' with Natural and  
784 Biotechnological Relevance. *Microbes Environ.* (2009); 24: 205-216.
- 785 65. D'Hondt S, Rutherford S, Spivack AJ. Metabolic activity of subsurface life in deep-sea  
786 sediments. *Science.* (2002); 295: 2067-2070.
- 787 66. Xia Y, Lü C, Hou N, Xin Y, Liu J, Liu H, et al. Sulfide production and oxidation by  
788 heterotrophic bacteria under aerobic conditions. *ISME J.* (2017); 11: 2754.

789

790

791

792

793

794

795

796

797

798

799

800

801

802

803

804 **Figure**

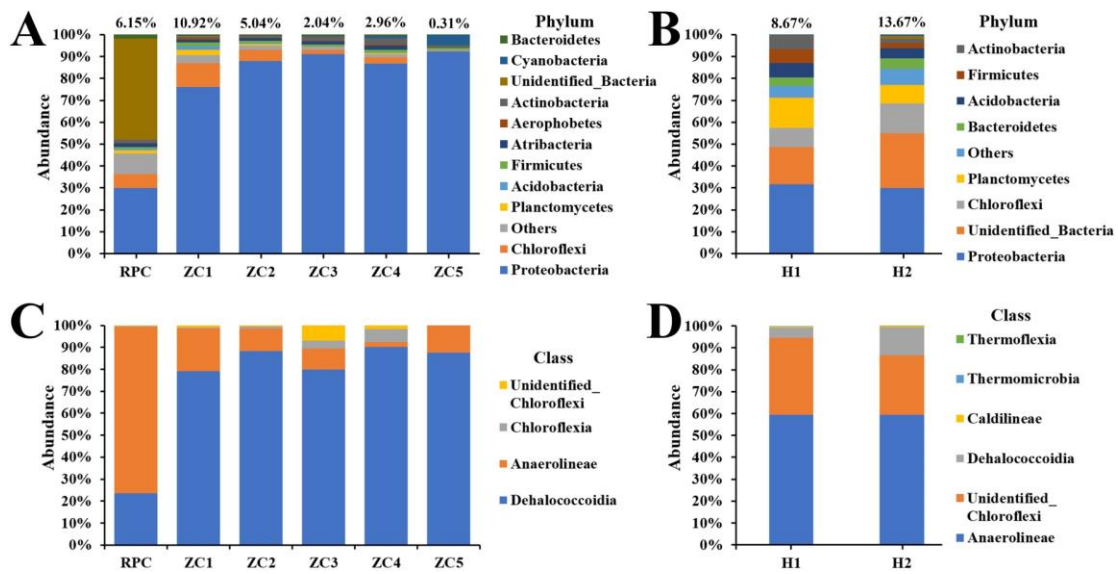

805

806 **Fig. 1.** Detection of the abundance of the phylum Chloroflexi derived from the  
807 deep-sea cold seep and hydrothermal vents sediments. The community structure of six  
808 sampling sites in the cold seep sediments and two sampling sites in the hydrothermal  
809 vents sediments as revealed by 16S rRNA gene amplicon profiling. The relative  
810 abundances of operational taxonomic units (OTUs) representing different bacteria are  
811 shown at the phylum level (A and B) and class level (C and D). Panels A and C  
812 represent samples from the cold seep; Panels B and D represent samples from the  
813 hydrothermal vents.

814

815

816

817

818

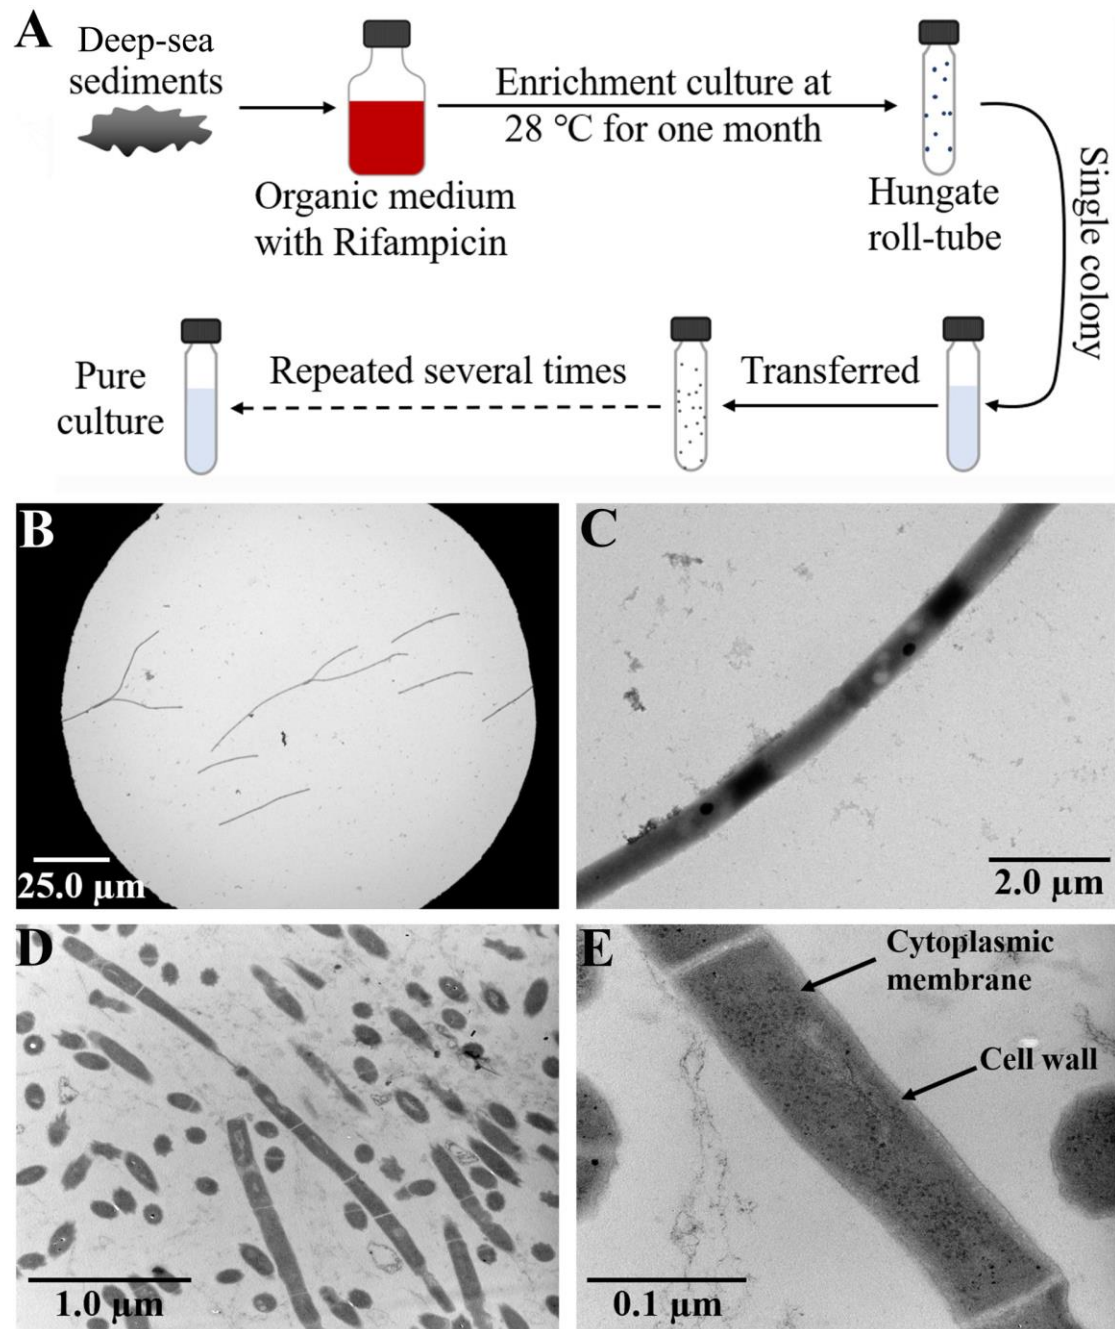

819

820 **Fig. 2.** Rifampicin resistance-driven enrichment and isolation strategy of Chloroflexi

821 bacteria. (A) Diagrammatic scheme of enrichment and isolation of Chloroflexi

822 bacteria. (B, C) TEM observation of strain ZRK33. (D, E) TEM observation of the

823 ultrathin sections of strain ZRK33.

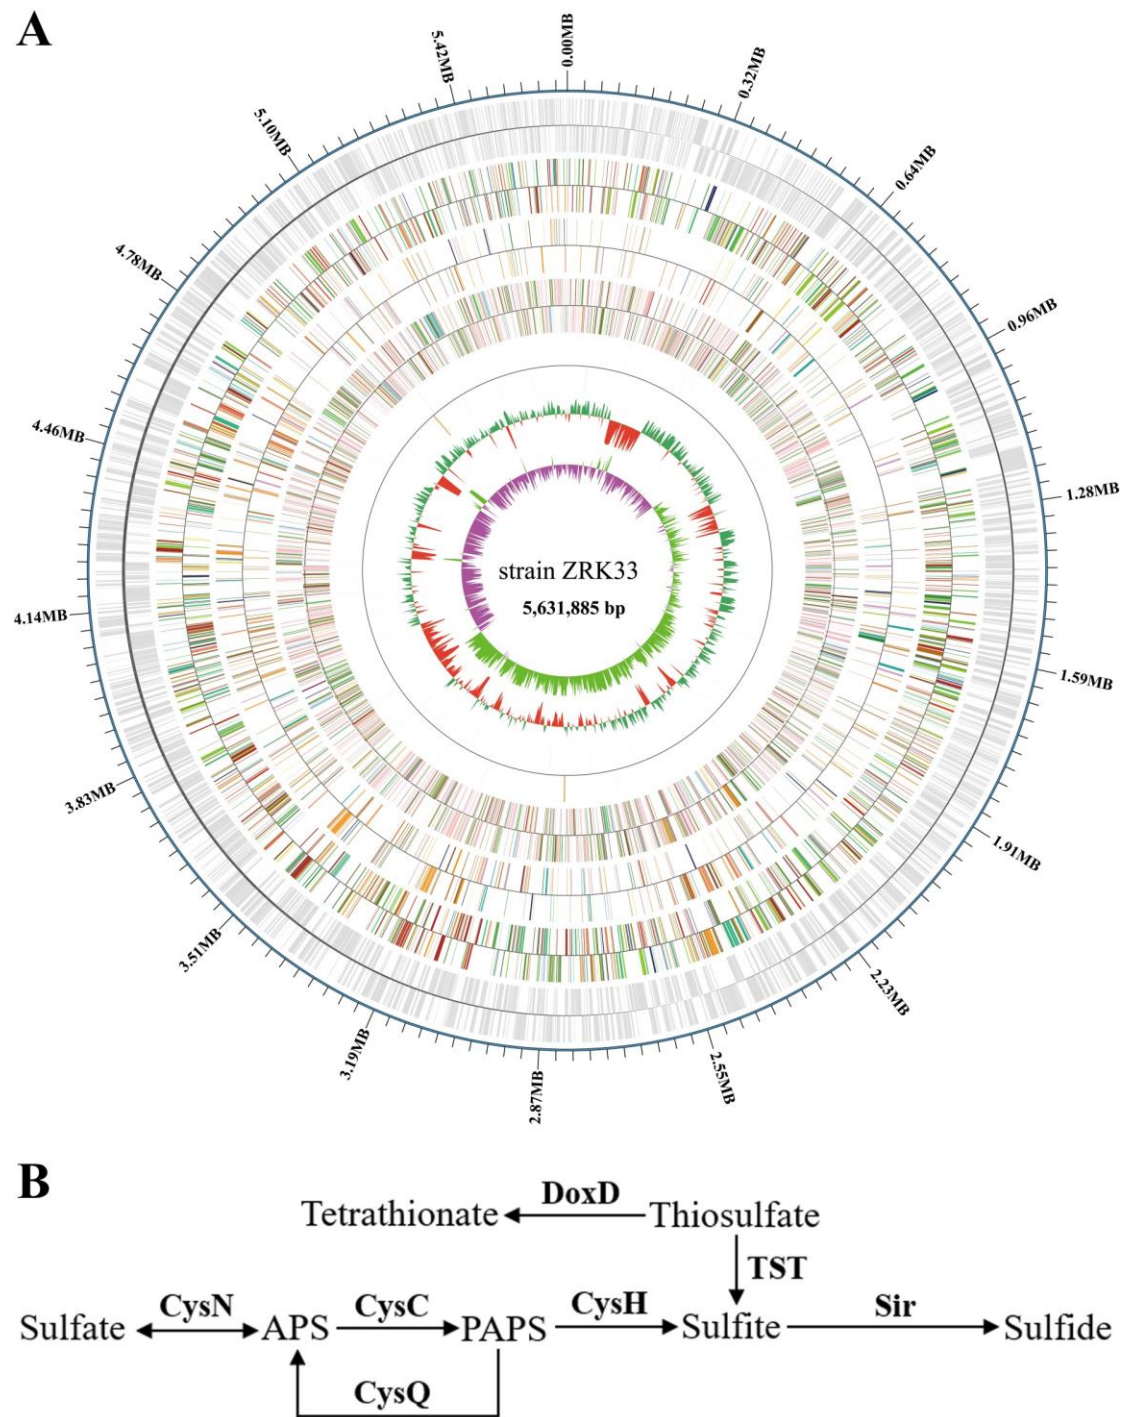

824

825 **Fig. 3.** Genomic analysis of strain ZRK33. (A) Circular diagram of the genome of

826 strain ZRK33. Rings indicate, from outside to the center: a genome-wide marker with

827 a scale of 320 kb; forward strand genes, colored by COG category; reverse strand

828 genes, colored by COG category; gene function annotation (COG, KEGG, GO, NR,

829 CAZy, TCDB); RNA genes (tRNAs blue, rRNAs purple); GC content; GC skew. (B)

830 Proposed assimilatory sulfate reduction pathway identified in the genome of strain  
831 ZRK33. Abbreviations: CysN, sulfate adenylyltransferase; Sat, sulfate  
832 adenylyltransferase; CysC, adenylyl-sulfate kinase; CysQ, 3', 5'-bisphosphate  
833 nucleotidase; CysH, phosphoadenosine phosphosulfate reductase; Sir, sulfite  
834 reductase; TST, thiosulfate/3-mercaptopyruvate sulfurtransferase; DoxD, thiosulfate  
835 dehydrogenase (quinone) large subunit; APS, adenosine 5'-phosphosulfate; PAPS,  
836 3'-phosphoadenosine-5'-phosphosulfate (3'-phosphoadenylylsulfate).

837

838

839

840

841

842

843

844

845

846

847

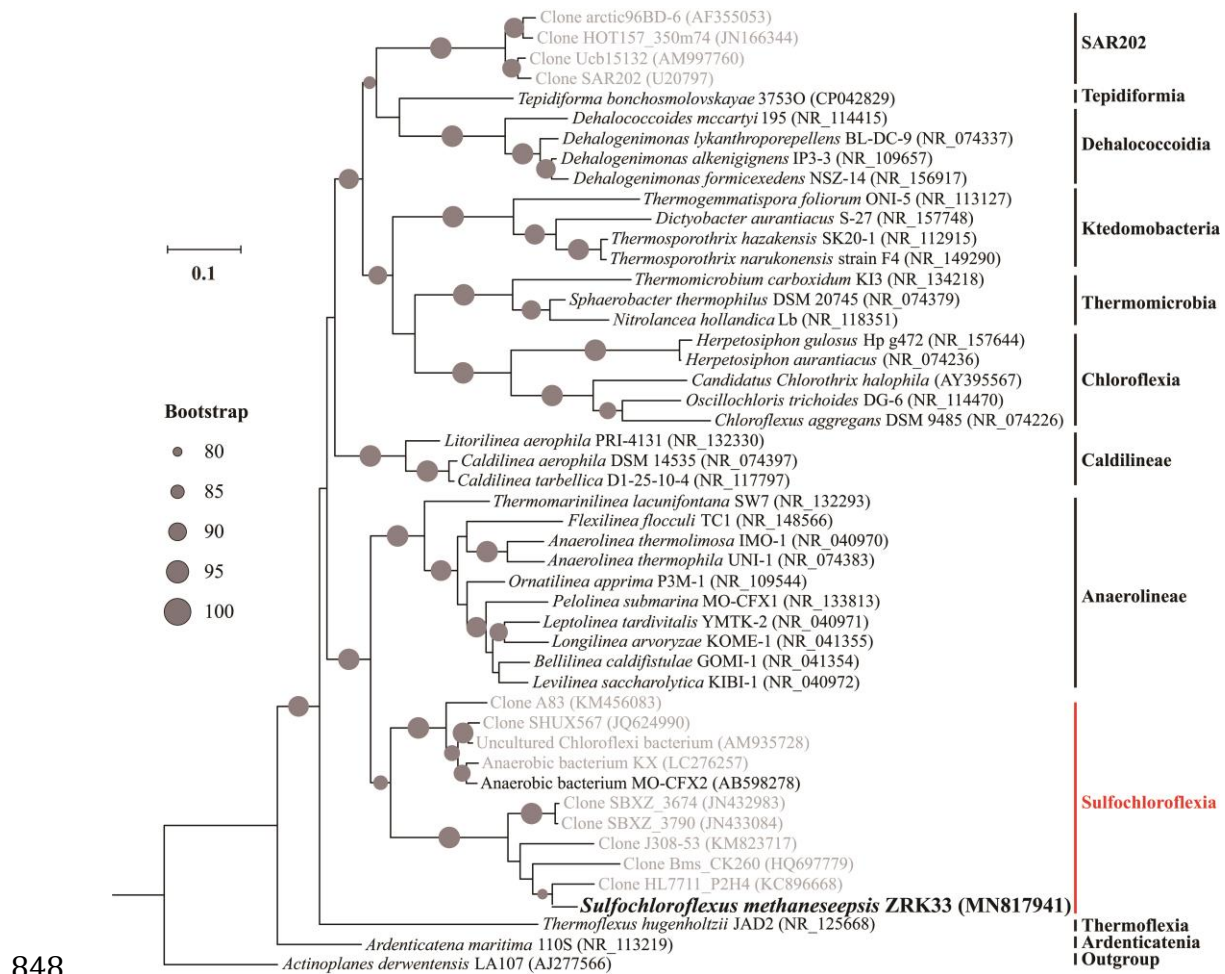

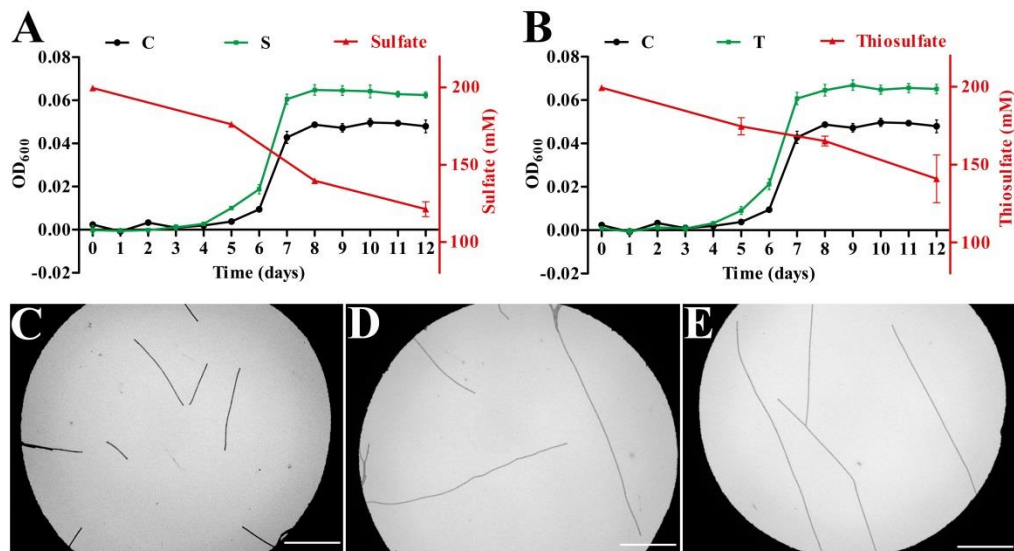

858 **Fig. 5.** Verification of sulfate and thiosulfate assimilation in *S. methaneseepsis*  
859 ZRK33. (A) Growth assay and sulfate metabolization of strain ZRK33 cultured in the  
860 medium supplemented without or with 200 mM Na<sub>2</sub>SO<sub>4</sub>. (B) Growth assay and  
861 thiosulfate metabolization of strain ZRK33 cultured in the medium supplemented  
862 without or with 200 mM Na<sub>2</sub>S<sub>2</sub>O<sub>3</sub>. “C” indicates the control group, where strain  
863 ZRK33 was cultured in the medium supplemented without extra Na<sub>2</sub>SO<sub>4</sub> or Na<sub>2</sub>S<sub>2</sub>O<sub>3</sub>;  
864 “S” indicates the sulfate-treated group, where strain ZRK33 was cultured in the  
865 medium supplemented with 200 mM Na<sub>2</sub>SO<sub>4</sub>; “T” indicates the thiosulfate-treated  
866 group, where strain ZRK33 was cultured in the medium supplemented with 200 mM  
867 Na<sub>2</sub>S<sub>2</sub>O<sub>3</sub>. The black lines represent the growth curves of the control group; the green  
868 lines represent the growth curves of experimental groups; the red lines represent the  
869 variation tendency of concentrations of Na<sub>2</sub>SO<sub>4</sub> or Na<sub>2</sub>S<sub>2</sub>O<sub>3</sub>. (C) TEM observation of  
870 strain ZRK33 that cultured in the ORG medium. (D) TEM observation of strain  
871 ZRK33 that cultured in the ORG medium supplemented with 200 mM Na<sub>2</sub>SO<sub>4</sub>. (E)  
872 TEM observation of strain ZRK33 that cultured in the ORG medium supplemented  
873 with 200 mM Na<sub>2</sub>S<sub>2</sub>O<sub>3</sub>. The bar is 20 μm in the panels C, D and E.



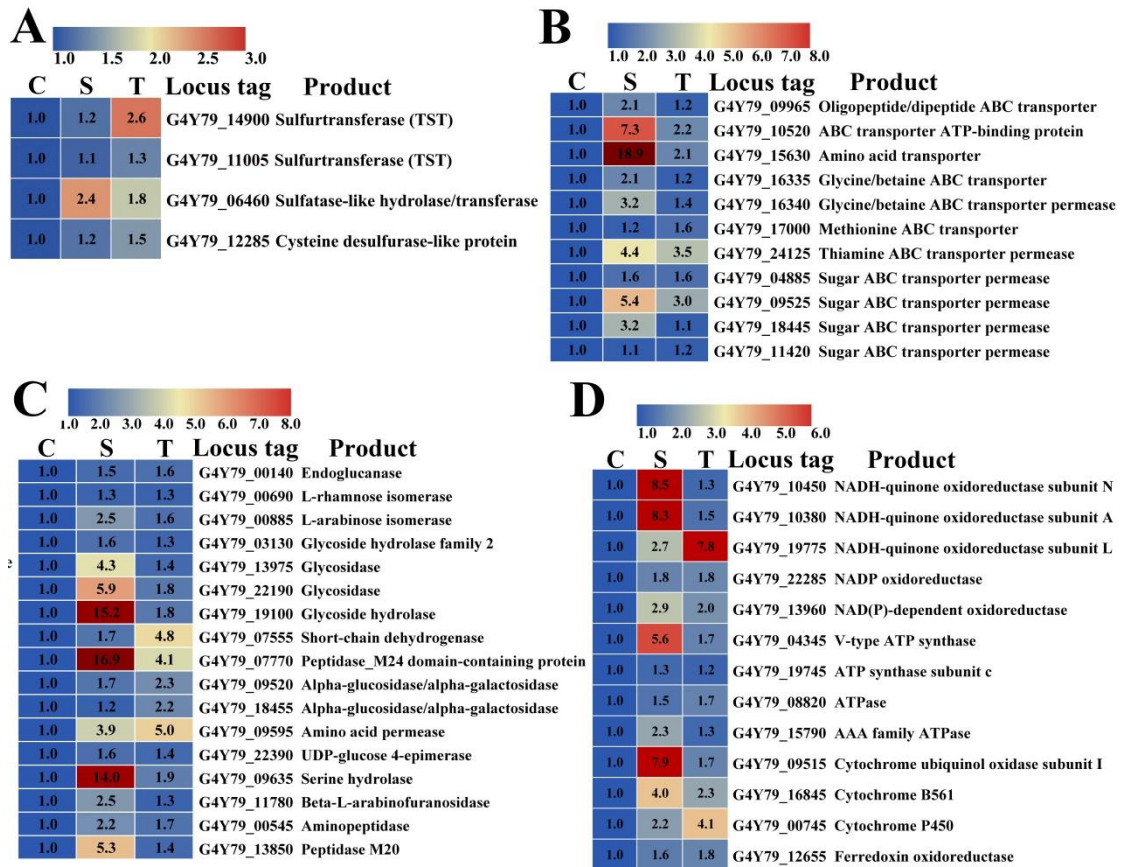

874 **Fig. 6.** Proteomic analysis of *S. methaneseepsis* ZRK33 cultured in the medium  
 875 supplemented with sulfate and thiosulfate. (A) Proteomics based heat map showing all  
 876 up-regulated proteins associated with sulfur metabolism. (B) Proteomics based heat  
 877 map showing all up-regulated proteins associated with amino acids and sugar  
 878 transporters. (C) Proteomics based heat map showing all up-regulated proteins  
 879 associated with saccharides/amino acids/peptides hydrolases. (D) Proteomics based  
 880 heat map showing all up-regulated proteins associated with energy production. “C”  
 881 indicates the control group, where strain ZRK33 was cultured in the medium  
 882 supplemented without extra  $\text{Na}_2\text{SO}_4$  or  $\text{Na}_2\text{S}_2\text{O}_3$ ; “S” indicates the sulfate-treated  
 883 group, where strain ZRK33 was cultured in the medium supplemented with 200 mM  
 884  $\text{Na}_2\text{SO}_4$ ; “T” indicates the thiosulfate-treated group, where strain ZRK33 was cultured  
 885 in the medium supplemented 200 mM  $\text{Na}_2\text{S}_2\text{O}_3$ .

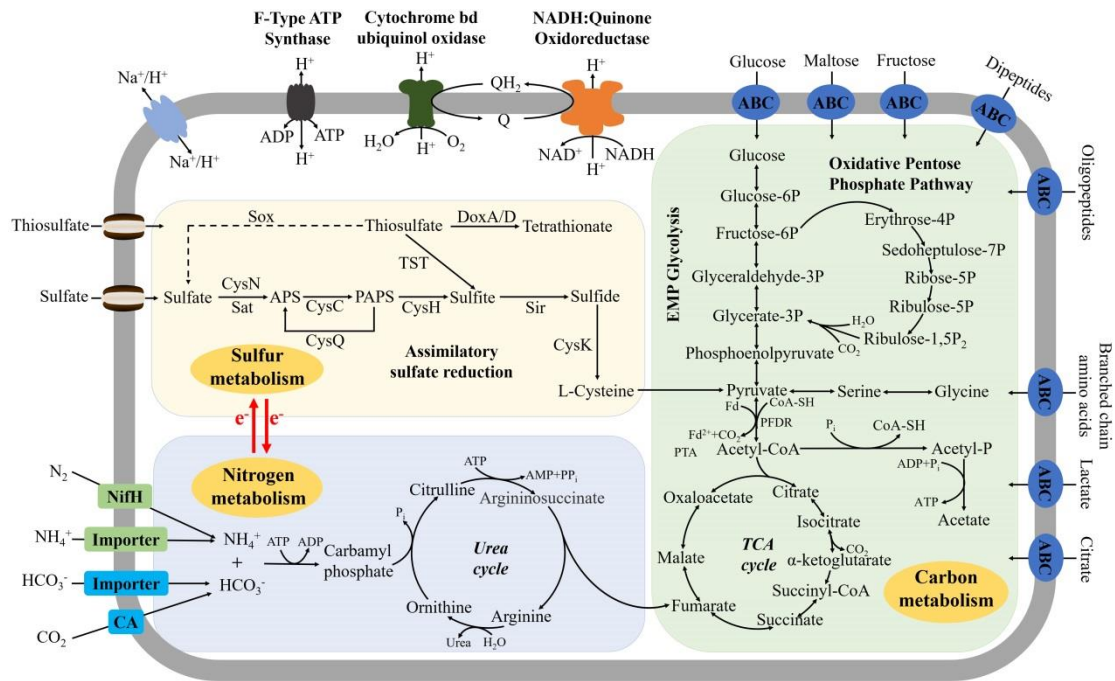

886 **Fig. 7.** Multi-omics based central metabolisms model of *S. methaneseepsis* ZRK33. In  
 887 this model, three central metabolic pathways (associated with carbon, sulfur and  
 888 nitrogen cyclings) including EMP glycolysis, oxidative pentose phosphate pathway,  
 889 TCA cycle, urea cycle, assimilatory sulfate reduction and some electron transport  
 890 systems are shown and highlighted with different colors. All the above items are  
 891 closely related to the energy production in *S. methaneseepsis* ZRK33. Abbreviations:  
 892 TCA, tricarboxylic acid cycle; Urea, urea cycle; ATP, 5'-Adenylate triphosphate;  
 893 ADP, adenosine diphosphate; AMP, adenosine monophosphate; CA, carbonic  
 894 anhydrase; NifH, nitrogenase iron protein; Q, quinone; QH<sub>2</sub>, ubiquinone; CysN,  
 895 sulfate adenylyltransferase; Sat, sulfate adenylyltransferase; CysC, adenylyl-sulfate  
 896 kinase; CysQ, 3', 5'-bisphosphate nucleotidase; CysH, phosphoadenosine  
 897 phosphosulfate reductase; Sir, sulfite reductase; CysK, cysteine synthase; TST,  
 898 thiosulfate/3-mercaptopyruvate sulfurtransferase; DoxA, thiosulfate dehydrogenase  
 899 (quinone) small subunit; DoxD, thiosulfate dehydrogenase (quinone) large subunit;  
 900 Sox, L-cysteine S-thiosulfotransferase.

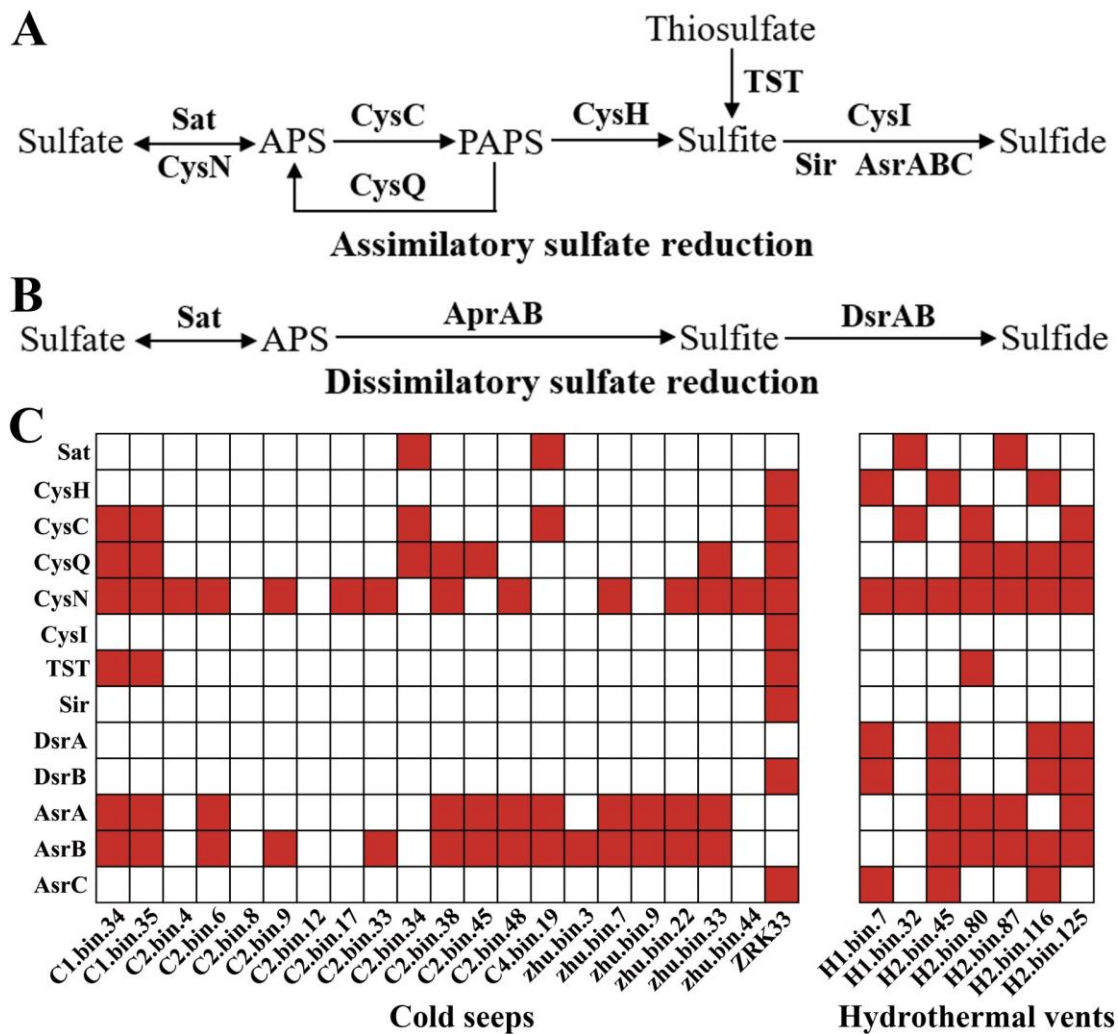

901

902 **Fig. 8.** Broad distribution of genes encoding key enzymes driving assimilatory and

903 dissimilatory sulfate reduction pathways in the metagenome-assembled genomes

904 (MAGs) of Chloroflexi bacteria derived from deep-sea cold seep and hydrothermal

905 vents sediments. (A) Typical pathway of assimilatory sulfate reduction existing in

906 bacteria. (B) Typical pathway of dissimilatory sulfate reduction existing in bacteria.

907 (C) Distribution of genes encoding key enzymes involved in assimilatory and

908 dissimilatory sulfur metabolisms in deep-sea Chloroflexi MAGs and strain ZRK33.

909 The presence of enzymes involved in the sulfur metabolic pathway is indicated by

910 using red colored rectangles. Sat, sulfate adenylyltransferase; CysN, sulfate

- 911 adenylyltransferase; CysC, adenylyl-sulfate kinase; CysQ, 3', 5'-bisphosphate  
912 nucleotidase; CysH, phosphoadenosine phosphosulfate reductase; Sir, sulfite  
913 reductase; AsrA, AsrB and AsrC, anaerobic sulfite reductases; CysI, sulfite reductase  
914 (NADPH) hemoprotein beta-component; TST, thiosulfate/3-mercaptopyruvate  
915 sulfurtransferase; AprA and AprB, adenylylsulfate reductase; DsrA and DsrB,  
916 dissimilatory sulfite reductase.
